# Supplementary material for: Halide-free neodymium phosphate based catalyst for highly cis-1,4 selective polymerization of dienes
Source: Royal Society of Chemistry journal article supplement (doi:10.1039/c8ra10050k), 2019-01-01
Supplement: c8ra10050k1.pdf [file c8ra10050k1.pdf]

**Halide-Free Neodymium Phosphate Based Catalyst for Highly *Cis*-1,4 Selective Polymerization of Dienes**

Yixin Ren, Justin T. Miller, Stefanie T. Polderman, Trinh D. Vo, Adele C. M. Wallace, John Michael O. Cue, Sarah T. Tran, Michael C. Biewer, Mihaela C. Stefan\*

\*Department of Chemistry and Biochemistry, The University of Texas at Dallas, 800 W. Campbell Rd., Richardson, TX 75080-3021

\*Department of Bioengineering, The University of Texas at Dallas, 800 W. Campbell Rd., Richardson, Texas, 75080-3021

Mihaela C. Stefan (E-mail: [mci071000@utdallas.edu](mailto:mci071000@utdallas.edu))

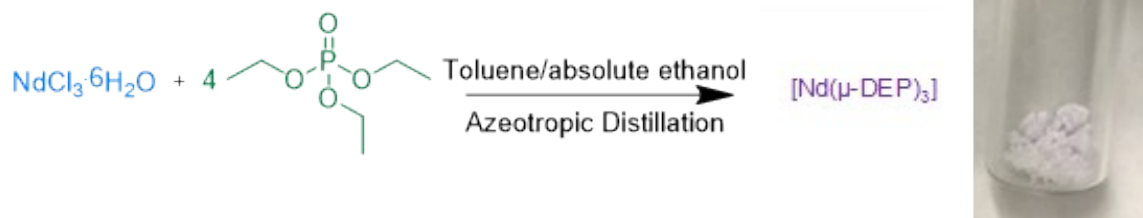

**Scheme S1.** Synthesis of  $[\text{Nd}(\mu\text{-DEP})_3]_x$  *via* azeotropic distillation method.

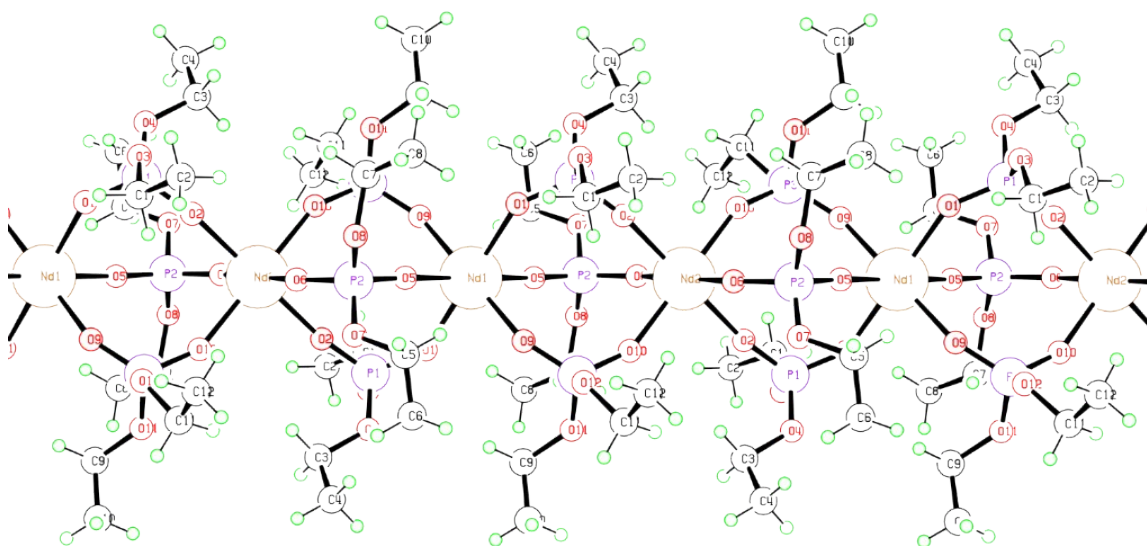

**Figure S1.** ORTEP diagram for  $[\text{Nd}(\mu\text{-DEP})_3]_x$

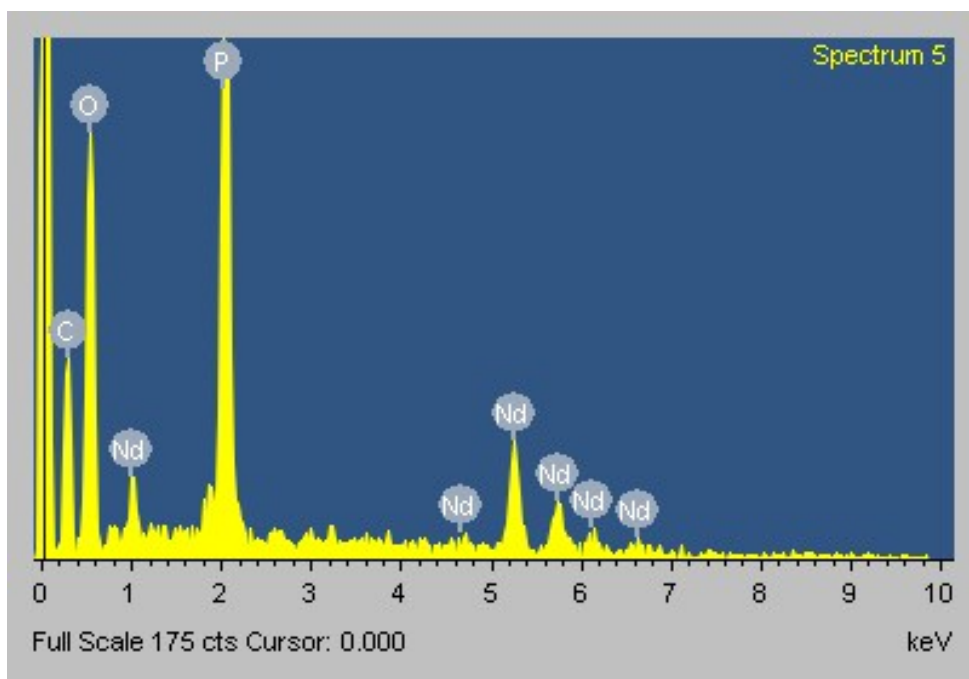

**Figure S2.** EDX result of  $[\text{Nd}(\mu\text{-DEP})_3]_x$ .

**Table S1.** Control experiments for the poly( $\beta$ -myrcene) synthesis.

| Nd compound                                   | [Nd]:[TIBA] | Yield (%)                      | $M_n$ (g/mol) | PDI  | Cis-1,4 (%) |
|-----------------------------------------------|-------------|--------------------------------|---------------|------|-------------|
| $\text{NdCl}_3 \cdot 6\text{H}_2\text{O}$     | 1:0         | trace                          | -             | -    | -           |
| $[\text{Nd}(\mu\text{-DEP})_3]_x$             | 1:0         | trace                          | -             | -    | -           |
| TIBA                                          | 0:1         | Insoluble cross-linked polymer |               |      | -           |
| $[\text{Nd}(\mu\text{-DEP})_3]_x/\text{TIBA}$ | 1:30        | 100                            | 13,000        | 1.80 | 96.0        |

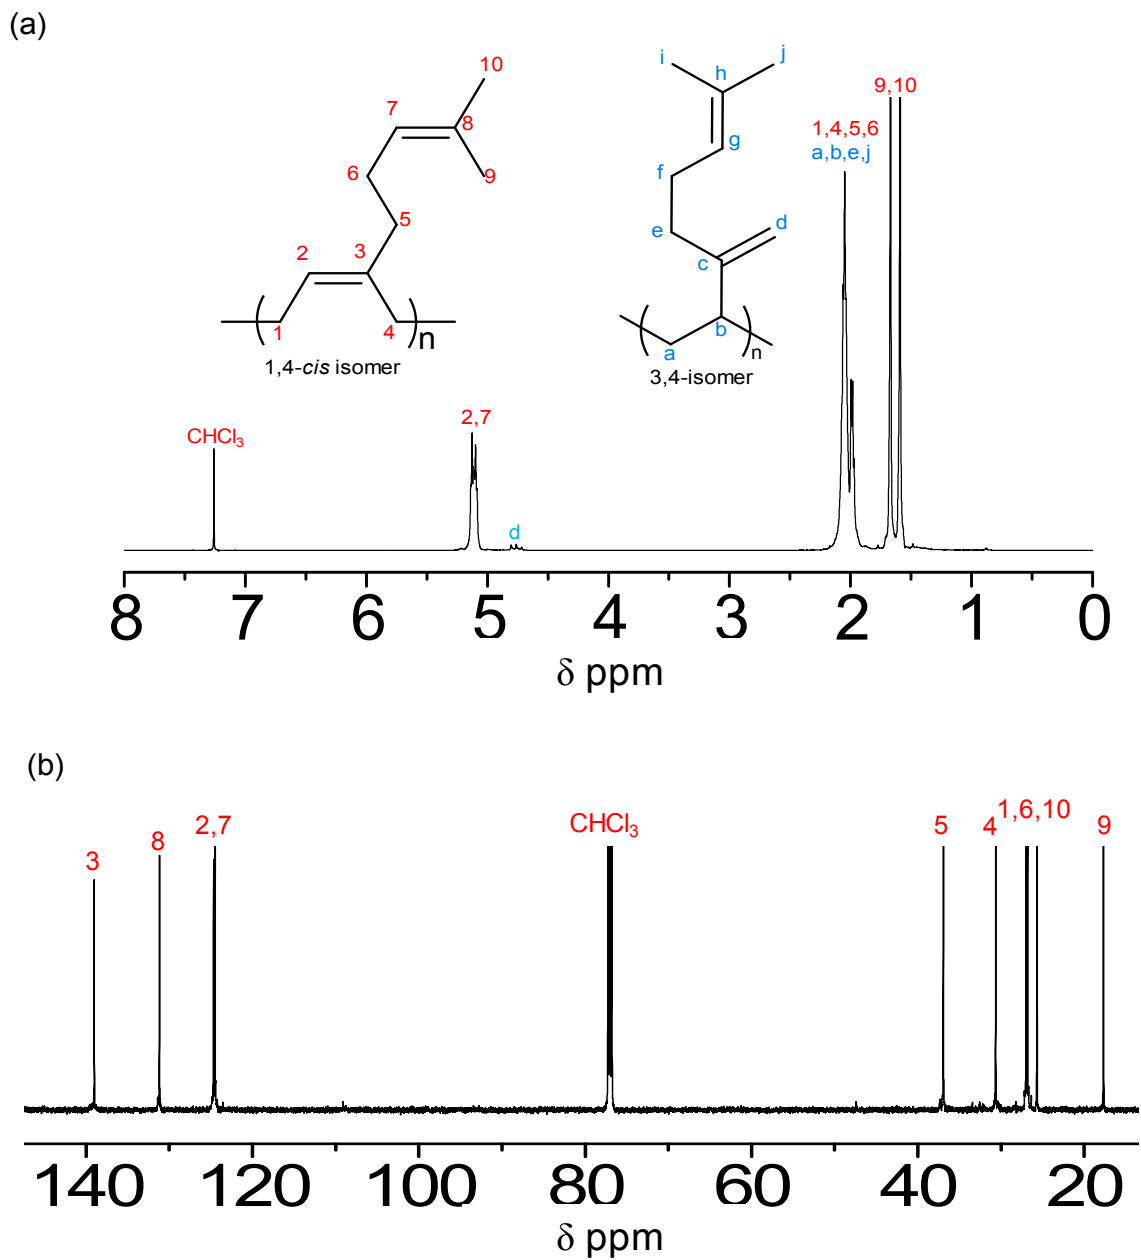

**Figure S3.** (a)  $^1\text{H}$  and (b)  $^{13}\text{C}$  NMR spectrum of the poly( $\beta$ -myrcene). Reaction condition:  $[\text{Nd}]:[\text{TIBA}]:[\beta\text{-myrcene}] = 1:30:250$  at room temperature for 2 hours.

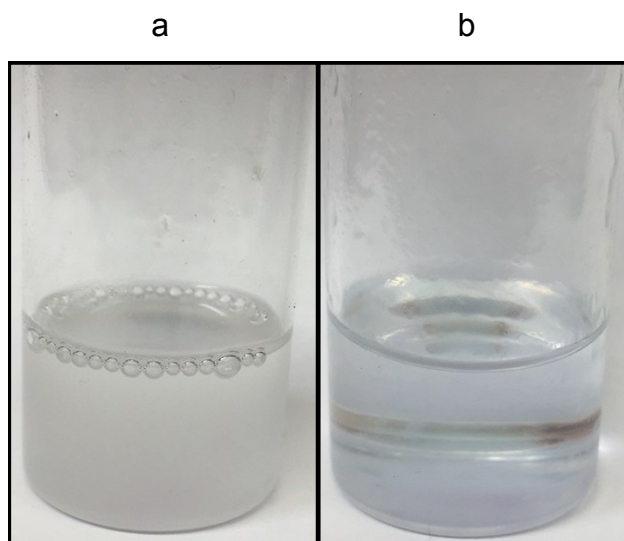

**Figure S4.** Solubility test before and after addition of the co-catalyst TIBA, (a) the Nd catalyst in toluene, (b) after addition of TIBA.

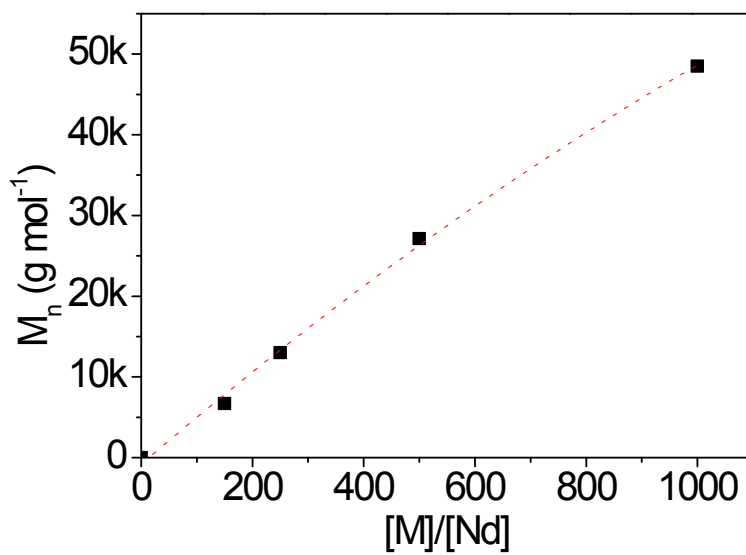

**Figure S5.**  $M_n$  versus  $[M]/[Nd]$  ratio. Reaction conditions: room temperature, at the molar ratio of  $[M]:[Nd]:[TIBA] = 250:1:30$ .

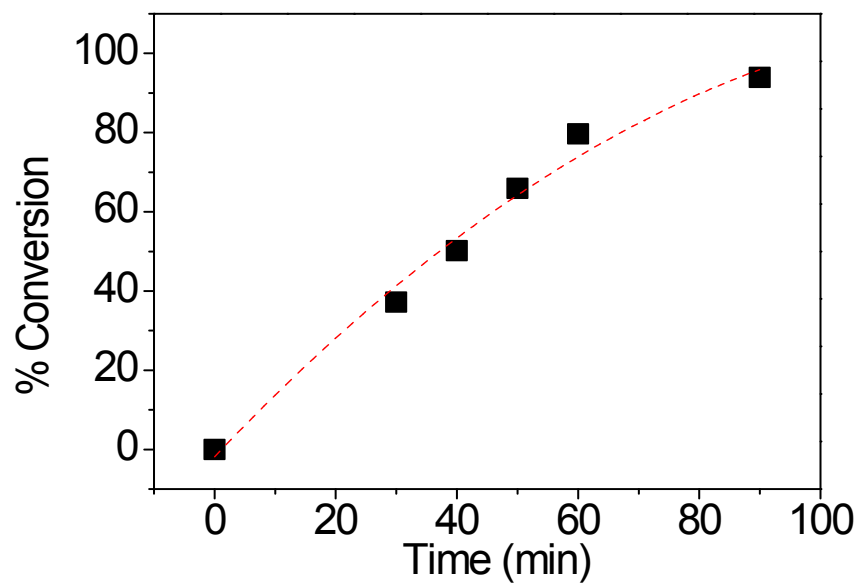

**Figure S6.** Conversion versus time for the polymerization of  $\beta$ -myrcene at room temperature for the ratio of  $[M]:[Nd]:[TIBA] = 250:1:30$ .
